# Supplementary material
Source: PubMed Central journal article supplement (PMC164700)
Supplement: pnas_1332808100_1.pdf [file pnas_1332808100_1.pdf]

## Appendix A. Solution of Eq. 4

### Recoil of a bent fiber in a viscous fluid

For small deflections, the viscoelastic recoil of a fiber in a viscous fluid can be described by modified beam equation. In contrast to cilia which exert an active force, a bent fiber exerts a passive distributed drag force on the surrounding fluid due to the potential energy stored in its initial deformed shape. The modified beam equation describing this recoil is given by Eq. 4.

$$EI \frac{\partial^4 y}{\partial x^4} = -\frac{\pi}{c} \frac{\mu r_f^2}{K_p} \frac{\partial y}{\partial t}, \quad [\text{A1}]$$

where the coordinate system and local instantaneous velocity are shown in Fig. A1.

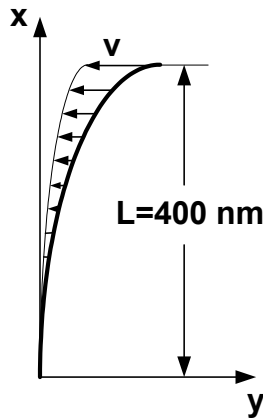

**Fig. A1.** Sketch of recoiling fiber

Eq. **A1** can be cast in dimensionless form

$$Y_{xxxx} = -Y_T, \quad [\text{A2}]$$

by introducing the dimensionless coordinates  $X = x/L$  and  $Y = y/y(L,0)$ , and dimensionless time  $T = t/\tau$ , where  $\tau = kL^4/EI$ .  $k = (\pi/c)(\mu r_f^2/K_p)$ , the coefficient of the velocity term in

Eq. **A1**, is described in the main text.

Eq. **A2** satisfies the dimensionless boundary and initial conditions:

$$Y(0,T) = \frac{\partial Y(0,T)}{\partial X} = \frac{\partial^2 Y(1,T)}{\partial X^2} = \frac{\partial^3 Y(1,T)}{\partial X^3} = 0, \quad [\text{A3a, b, c, d}]$$

$$Y(X,0) = \frac{3}{2}X^2 - \frac{1}{2}X^3, \quad [\text{A3e}]$$

where Eq. **A3e** is the initial deflection due to a point load applied at  $X=1$ . The viscous loading term on the r.h.s. of Eq. **A2** is expressed in an infinite series of the form

$$-\frac{\partial Y}{\partial T} = a_2(T) \cdot X^2 + a_3(T) \cdot X^3 + a_4(T) \cdot X^4 + a_5(T) \cdot X^5 + a_6(T) \cdot X^6 + a_7(T) \cdot X^7 + \dots, \quad [\text{A4}]$$

where the  $a_i(T)$ ,  $i = 2, 3, 4 \dots$  are unknown time dependent functions. Substituting Eq. **A4** into Eq. **A2**, integrating term by term and applying the first two boundary conditions (**A3a, b**), one finds that

$$Y(X,T) = f_2(T) \cdot \frac{X^2}{2} + f_3(T) \cdot \frac{X^3}{6} + a_2(T) \cdot \frac{X^6}{360} + a_3(T) \cdot \frac{X^7}{840} + a_4(T) \cdot \frac{X^8}{1680} + a_5(T) \cdot \frac{X^9}{3024} \\ + a_6(T) \cdot \frac{X^{10}}{5040} + a_7(T) \cdot \frac{X^{11}}{7920} + \dots, \quad [\text{A5}]$$

where  $f_2(T)$  and  $f_3(T)$  are also unknown functions of time. Differentiating Eq. **A5** with respect to  $T$ , provides another way to express  $Y_T$ , which is equivalent to Eq. **A4**. Comparing the coefficients of  $X^n$  in these two expressions for  $Y_T$ , one obtains the following relationship between the  $a_i(T)$  and  $f_2(T)$  and  $f_3(T)$

$$a_2(T) = -\frac{f_2'(T)}{2}, \quad [\text{A6a}]$$

$$a_3(T) = -\frac{f_3'(T)}{6}, \quad [\text{A6b}]$$

$$a_4(T) = a_5(T) = 0, \quad [\text{A6c, d}]$$

$$a_6(T) = -\frac{a_2'(T)}{360} = \frac{f_2''(T)}{720}, \quad [\text{A6e}]$$

$$a_7(T) = -\frac{a_3'(T)}{840} = \frac{f_3''(T)}{5040}, \text{ etc.} \quad [\text{A6f}]$$

Therefore, Eq. **A5** can be rewritten as

$$Y(X, T) = f_2 \cdot \frac{X^2}{2} + f_3 \cdot \frac{X^3}{6} - f_2' \cdot \frac{X^6}{720} - f_3' \cdot \frac{X^7}{5040} + f_2'' \cdot \frac{X^{10}}{5040 \times 720} + f_3'' \cdot \frac{X^{11}}{5040 \times 7920} + \dots \quad [\text{A7}]$$

Conditions **A3c, d** require that  $f_2(T)$  and  $f_3(T)$  satisfy,

$$f_2 + f_3 - \frac{f_2'}{24} - \frac{f_3'}{120} + \frac{f_2''}{5040 \times 8} + \frac{f_3''}{5040 \times 72} + \dots = 0, \quad [\text{A8a}]$$

$$f_3 - \frac{f_2'}{6} - \frac{f_3'}{24} + \frac{f_2''}{5040} + \frac{f_3''}{5040 \times 8} + \dots = 0, \quad [\text{A8b}]$$

where higher order terms are neglected since Eq. **A7** converges rapidly. Terms involving  $f_2''$  and  $f_3''$  are also neglected because they introduce inertia which is very small in a viscous dominated flow. The coupled equations for  $f_2$  and  $f_3$  thus simplify to

$$\frac{1}{2880} \cdot \frac{d^2 f_3}{dT^2} + \frac{1}{12} \frac{df_3}{dT} + f_3 = 0. \quad [\text{A9}]$$

Assuming a solution for  $f_3$  of the form

$$f_3(T) = A \cdot e^{-\frac{T}{\xi}}, \quad [\text{A10}]$$

and substituting it into Eq. **A9**, one finds

$$1 - \frac{\xi}{12} + \frac{\xi^2}{2880} = 0, \quad [\text{A11}]$$

whose roots are  $\xi_1=0.0044$  and  $\xi_2=0.0789$ .

The solution for  $f_3$  is

$$f_3(T) = A_1 e^{-\frac{T}{\xi_1}} + A_2 e^{-\frac{T}{\xi_2}}. \quad [\text{A12}]$$

Then, the simplified version of Eqs. **A8a** and **b** gives

$$f_2(T) = -\frac{3}{4}f_3 - \frac{1}{480}f_3' = \frac{1}{4}A_1 e^{-\frac{T}{\xi_1}} \left( \frac{1}{120\xi_1} - 3 \right) + \frac{1}{4}A_2 e^{-\frac{T}{\xi_2}} \left( \frac{1}{120\xi_2} - 3 \right). \quad [\text{A13}]$$

$A_1$  and  $A_2$  are the integration constants which can be determined by applying the initial condition **A3e**.

$$A_1 = -\frac{3\xi_1(-1+120\xi_2)}{-\xi_2 + \xi_1}, \quad [\text{A14a}]$$

$$A_2 = \frac{3\xi_2(-1+120\xi_1)}{-\xi_2 + \xi_1}. \quad [\text{A14b}]$$

It should be pointed out that only first two terms in Eq. **A7** are required to satisfy initial condition **A3e**.

$\xi_1 \cdot \tau$  is the short dimensional time constant that accounts for the initial transient change in fiber shape after the point force  $P$  is released.  $\xi_2 \cdot \tau$  is the long dimensional time constant that describes the long time recoil. We require  $\xi_2 \cdot \tau$  be equal to the single exponential,  $\beta = 0.38$  s, obtained by curvefitting the experimental data in ref. 1. This matching leads to our theoretical prediction that  $EI = 700$  pN·nm<sup>2</sup>.

1. Vink, H., Duling, B. R. & Spaan, J. A. E. (1999) *FASEB J.* **13**, A11 (abstr.).
